# Supplementary material for: Serum Induces the Subunit-Specific Activation of NF-κB in Proliferating Human Cardiac Stem Cells
Source: MDPI journal article supplement (doi:10.3390/ijms25073593), 2024-03-22
Supplement: s1 [file s1]

Supplementary Data

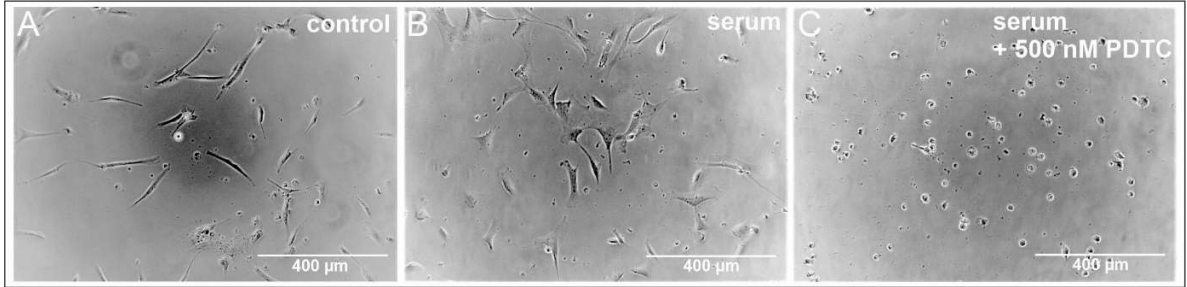

**Figure S1: 500 nM PDTC induces cell death of serum-treated hCSCs.** Light microscopy images reveal morphological changes indicating cell death after treatment with 500 nM PDTC (A-C).

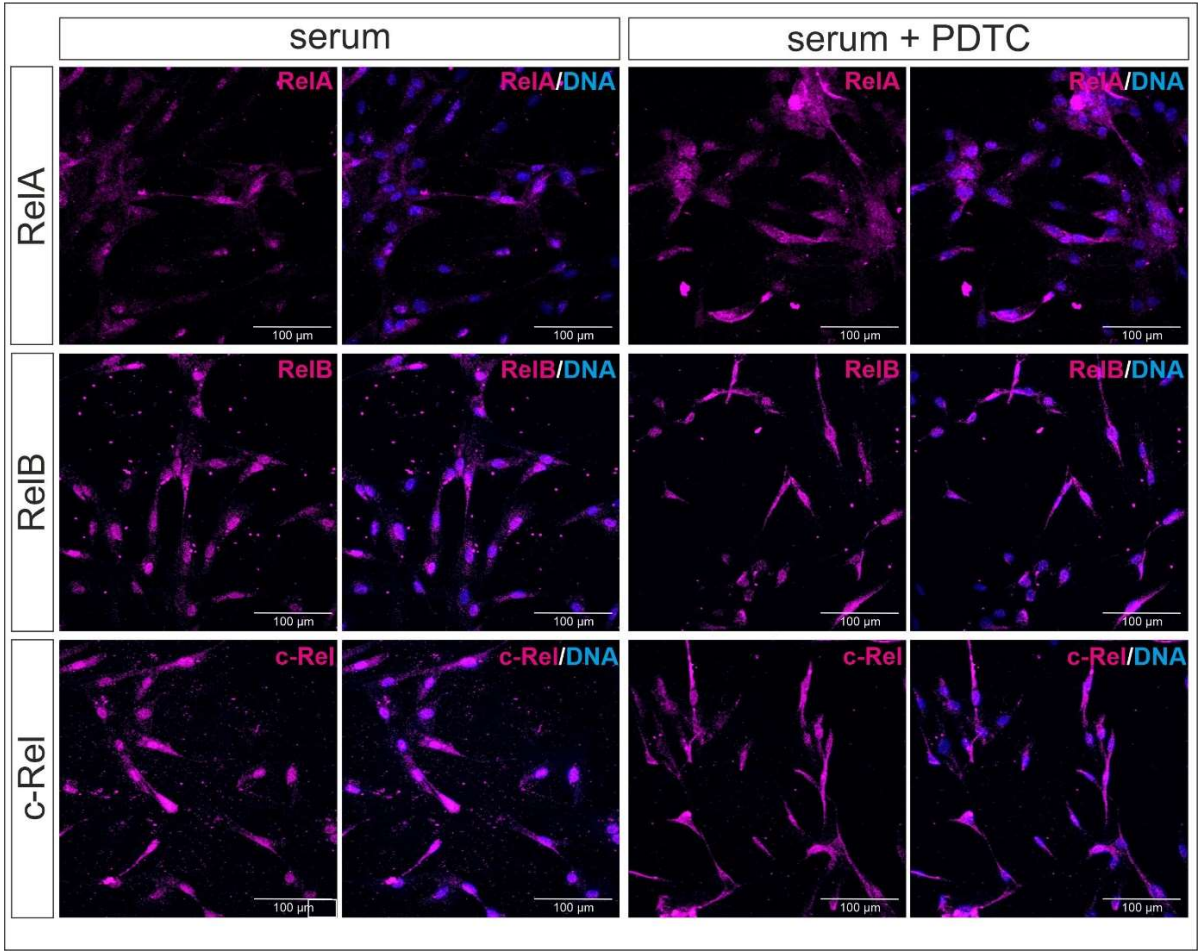

**Figure S2: PDTC significantly reduces the nuclear translocation of NF-κB subunits upon serum treatment.** The inductive effect of human blood serum on the nuclear translocation of RelA was significantly reduced by PDTC.

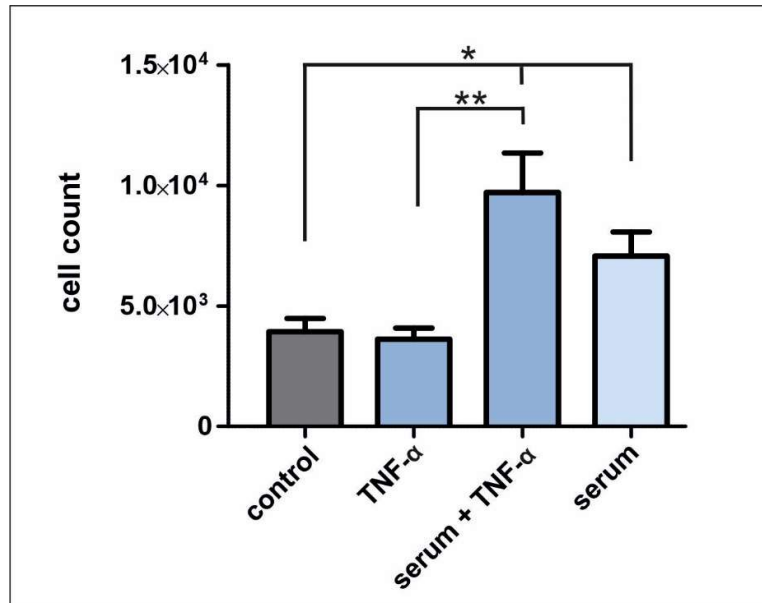

**Figure S3: TNF $\alpha$  does not induce hCSC-proliferation.** In proliferation assay, after starvation in serum-deprived medium for 72 hours, 10 ng/ml TNF $\alpha$ , 10% human blood serum or serum with 10 ng/ml TNF $\alpha$  were applied to hCSCs for 72 hours. Serum significantly increased proliferation while application of TNF $\alpha$  had no effect on hCSC proliferation. (female hCSC donors  $n=3$ , male hCSC donors  $n=3$ , human blood serum donors  $n=6$  (pooled); Mann Whitney U, \*\*  $p \leq 0.01$ , \* $p \leq 0.05$ )
